# Supplementary material for: Malignant atrophic papulosis with motor aphasia and intestinal perforation: A case report and review of published works
Source: PubMed Central journal article supplement — J Dermatol. 2018 Mar 8;45(6):723–6. doi: 10.1111/1346-8138.14280 (PMC6001538; doi:10.1111/1346-8138.14280), 2018-03-08
Supplement: JDE-45-723-s002.pdf [file JDE-45-723-s002.pdf]

### Supplementary Online Content

eTable 1. 2000 - 2017 case statistics of Degos' disease

| Case NO. | Reported year | Gender | Age    | Age at onset of cutaneous manifestations | Time to the development of systemic manifestations | Organs involved         | Whether presented during the pregnant | Cutaneous histopathology                                                                                                                                                                                              | Variant   | Systemic Treatment                                        | Outcome |
|----------|---------------|--------|--------|------------------------------------------|----------------------------------------------------|-------------------------|---------------------------------------|-----------------------------------------------------------------------------------------------------------------------------------------------------------------------------------------------------------------------|-----------|-----------------------------------------------------------|---------|
| 1        | 2000[1]       | M      | 44 Yrs | 42 Yrs                                   | 3 Yrs                                              | Skin, eyes, GIT, heart  | —                                     | Ulceration, degeneration of collagen fibers in the superficial dermis, perivascular lymphocytic infiltration of the remaining skin, and annular deposition of mucin. No vasculitis or thromboemboli were seen.        | Malignant | NA                                                        | Dead    |
| 2        | 2000[2]       | F      | 47 Yrs | NA                                       | NA                                                 | Skin, lungs, heart, GIT | —                                     | Hyperkeratosis, epidermal atrophy, dermo-epidermal separation, edema, and necrosis in the papillary dermis. Fibrinoid necrosis and thrombosis were seen in the papillary dermis and in the vessels below the lesions. | Malignant | anti-inflammatory drugs                                   | ND      |
| 3        | 2000[3]       | M      | 47 Yrs | NA                                       | NA                                                 | Skin, penile (ulceratio | —                                     | Cutaneous tissue necrosis, surrounded by mucinous infiltration and a perivascular lymphohistiocytic infiltrate                                                                                                        | Malignant | Aspirin, dipyridamole, cyclosporine, heparin, tacrolimus, | Dead    |

|    |          |   |        |        |       |             |     |                                                                                                                                                                                                                                                 |           |                                                                             |                                                 |  |
|----|----------|---|--------|--------|-------|-------------|-----|-------------------------------------------------------------------------------------------------------------------------------------------------------------------------------------------------------------------------------------------------|-----------|-----------------------------------------------------------------------------|-------------------------------------------------|--|
|    |          |   |        |        |       | n), GIT     |     |                                                                                                                                                                                                                                                 |           |                                                                             | prednisolone, azathioprine and cyclophosphamide |  |
| 4  | 2000[4]  | M | 47 Yrs | 44 Yrs | 3 Yrs | Skin, heart | —   | Markedly thin smooth muscle of vessels with invasion of lymphoid cells.                                                                                                                                                                         | Malignant | Aspirin, cardiac catheterization                                            | Alive                                           |  |
| 5  | 2001[5]  | M | 48 Yrs | 48 Yrs | 2 Mos | Skin, GIT   | —   | NA                                                                                                                                                                                                                                              | Malignant | corticosteroids, heparin, cyclosporin, tacrolimus, aspirin, and clopidogrel | Dead                                            |  |
| 6  | 2001[6]  | M | 52 Yrs | 52 Yrs | —     | Skin        | —   | Wedge-shaped dermal infarct with thrombosed vessels at the apex                                                                                                                                                                                 | Benign    | aspirin                                                                     | Alive                                           |  |
| 7  | 2001[7]  | M | 53 Yrs | 47 Yrs | —     | Skin        | —   | Fully developed lesions exhibited a prominent lymphocytic vasculitis as evidenced by intramural lymphocytes, mural fibrin deposition, and intraluminal thrombi with a surrounding lymphocytic infiltrate containing lymphocytic nuclear debris. | Benign    | pentoxifylline                                                              | Alive                                           |  |
| 8  | 2001[8]  | M | 71 Yrs | NA     | —     | Skin        | —   | NA                                                                                                                                                                                                                                              | Benign    | pentoxifylline and aspirin                                                  | Alive                                           |  |
| 9  | 2002[9]  | F | 32 Yrs | 22 Yrs | —     | Skin        | Yes | Vessels adjacent and deep to the infarct show a dense perivascular infiltrate. A small arteriole deep to the apex of the wedge demonstrates endothelial hyperplasia and occlusion.                                                              | Benign    | No treatment                                                                | Alive                                           |  |
| 10 | 2002[10] | F | 7      | 2 Mos  | —     | Skin        | —   | Dermal–epidermal band-like infiltrate                                                                                                                                                                                                           | Benign    | Aspirin and                                                                 | Alive                                           |  |

|           |          |   |        |        |       |                    |   |                                                                                                                                                                                                                                                                                                                           |           |                                          |       |
|-----------|----------|---|--------|--------|-------|--------------------|---|---------------------------------------------------------------------------------------------------------------------------------------------------------------------------------------------------------------------------------------------------------------------------------------------------------------------------|-----------|------------------------------------------|-------|
|           |          |   | Mos    |        |       |                    |   | together with superficial and deep perivascular mononuclear infiltrates. Dermal-hypodermal vessels showed lymphocytic infiltration of the vessel walls, fibrinoid necrosis, endothelial swelling and disruption of the intima.                                                                                            |           | dipyridamole                             |       |
| <b>11</b> | 2003[11] | F | 56 Yrs | NA     | NA    | Skin, GIT          | — | Acute stenotic endovascular proliferation with thrombosis in the absence of any appreciable inflammation, infiltrated in the walls of venules and small arteries.                                                                                                                                                         | Malignant | ND                                       | Dead  |
| <b>12</b> | 2003[12] | F | 24 Yrs | 24 Yrs | 1 Mo  | Skin, GIT          | — | Clearly demarcated necrotic and atrophic epidermis, and lymphocytes and neutrophils infiltrating in the vicinity of vessels in the dermis. Arterioles occluded by thrombi in the mid-dermis were seen in a serial section                                                                                                 | Malignant | Nicotine patches                         | Alive |
| <b>13</b> | 2003[13] | M | 26 Yrs | 13 Yrs | —     | Skin               | — | At the base of the area of necrobiosis, serial sections revealed an occluded vessel with a dense lymphoid cell infiltration. Marked oedema with perivascular and periadnexal lymphohistiocytic infiltrate in the reticular and middermis as well as thickening of the vessel walls with deposition of fibrinoid material. | Benign    | acetylsalicylic acid and dipyridamole    | Alive |
| <b>14</b> | 2003[14] | M | 19 Yrs | 16 Yrs | 3 Yrs | Skin, eyes, penile | — | ND                                                                                                                                                                                                                                                                                                                        | Malignant | steroids, dapsone, rifampicin ,cyclophos | Dead  |

|    |          |   |        |        |       |                                          |   |                                                                                                                                                                                                  |           |                                                              |                                       |
|----|----------|---|--------|--------|-------|------------------------------------------|---|--------------------------------------------------------------------------------------------------------------------------------------------------------------------------------------------------|-----------|--------------------------------------------------------------|---------------------------------------|
|    |          |   |        |        |       | (ulceration), vocal cords, lungs, kidney |   |                                                                                                                                                                                                  |           | phamide, aspirin, dipyridamole, pentoxifylline, cyclosporine |                                       |
| 15 | 2003[15] | F | 22 Yrs | NA     | —     | Skin                                     | — | Wedge-shaped mucin deposits and sclerosis in the upper reticular dermis. Vacuolar interface dermatitis. Sclerosis with intact elastic fibers.                                                    | Benign    | Aspirin                                                      | Alive                                 |
| 16 | 2004[16] | M | 34 Yrs | 14 Yrs | —     | Skin                                     | — | The epidermis is atrophic, and the dermis is hypocellular. The perivascular mononuclear cell infiltration, thrombosis, and thickening of the vessel walls with deposition of fibrinoid material. | Benign    | Aspirin                                                      | Alive                                 |
| 17 | 2004[17] | F | 56 Yrs | 50 Yrs | 6 Yrs | Skin, lungs                              | — | A wedge-shaped zone of necrosis, scattered necrotic keratinocytes, mild vacuolar change, dermal edema with mucin, and a sparse perivascular infiltrate.                                          | Malignant | Dipyridamole and aspirin                                     | Dead                                  |
| 18 | 2004[17] | F | 40 Yrs | 38 Yrs | —     | Skin(ANA positive)                       | — | A wedge-shaped area of necrosis in the dermis with abundant mucin deposition. There was a sparse superficial perivascular infiltrate of lymphocytes.                                             | Benign    | Aspirin                                                      | Stable through 30 months of follow-up |
| 19 | 2004[17] | F | 63 Yrs | 61 Yrs | —     | Skin(ANA positive)                       | — | A wedge-shaped area of necrosis in the dermis with abundant mucin deposition, mild dermoepidermal interface change with occasional necrotic keratinocytes,                                       | Benign    | Aspirin and dipyridamole                                     | Stable through 7 months of follow-up  |

|    |          |   |        |        |        |                                                                |   |                                                                                                                                                                                                                                                                                                                                |           |                                                                                                                   |                                       |
|----|----------|---|--------|--------|--------|----------------------------------------------------------------|---|--------------------------------------------------------------------------------------------------------------------------------------------------------------------------------------------------------------------------------------------------------------------------------------------------------------------------------|-----------|-------------------------------------------------------------------------------------------------------------------|---------------------------------------|
|    |          |   |        |        |        |                                                                |   | and a sparse superficial perivascular infiltrate of lymphocytes.                                                                                                                                                                                                                                                               |           |                                                                                                                   |                                       |
| 20 | 2004[17] | F | 39 Yrs | 34 Yrs | —      | Skin(ANA positive)                                             | — | Incipient focal necrosis, epidermal atrophy, vacuolar interface change, dermal mucin and a superficial perivascular lymphocytic infiltrate.                                                                                                                                                                                    | Benign    | Aspirin                                                                                                           | Stable through 16 months of follow-up |
| 21 | 2004[18] | F | 49 Yrs | 48 Yrs | 1 Yr   | Skin, GIT, lungs                                               | — | Rare inflamed vessels, occlusion of vascular lumens by fibrointimal proliferation and organized fibrin thrombi, and atrophy of vessel wall with fibrin deposition.                                                                                                                                                             | Malignant | Dipridamole, indomethacin, and enoxaparin                                                                         | Dead                                  |
| 22 | 2005[19] | F | 29 Yrs | 26 Yrs | 26 Yrs | Skin, CNS(brain and spinal cord)                               | — | Deep dermis arteriolar hyalinosis with endothelial hyperplasia and perivascular lymphomonocitic infiltrate                                                                                                                                                                                                                     | Malignant | Antiinflammatory drugs, immunosuppressant treatments, and plasmapheresis. Antiplatelets and antidepressant drugs. | NA                                    |
| 23 | 2005[20] | M | 43 Yrs | NA     | NA     | Skin(including palms, soles and face), penile (ulceration)CNS, | — | Hyperkeratosis, atrophy of the epidermis, superficial perivascular lymphocytes infiltration, a sprinkling of lymphocytes along The dermo-epidermal junction in conjunction with vacuolar alteration, and an occasional necrotic keratocyte in a thinned epidermis, fibrinoid necrosis in papillary dermis and hyalinization of | Malignant | Pentoxifylline, dipyridamole and immunoglobulin                                                                   | Dead                                  |

|    |          |   |        |        |       |                                             |   |                                                                                                                                                                                                  |           |                                                                                |       |
|----|----------|---|--------|--------|-------|---------------------------------------------|---|--------------------------------------------------------------------------------------------------------------------------------------------------------------------------------------------------|-----------|--------------------------------------------------------------------------------|-------|
|    |          |   |        |        |       | GIT                                         |   | subepidermal collagen.                                                                                                                                                                           |           |                                                                                |       |
| 24 | 2005[21] | M | 38 Yrs | 33 Yrs | 5 Yrs | Skin, penile (ulceration) CNS, GIT, lungs   | — | Atrophic hyperkeratotic epidermis overlying and inverted, cone-shaped area of necrosis. Blood vessels in the dermis with narrowing of the lumens and perivascular mononuclear cell infiltration. | Malignant | Aspirin, warfarin, clopidogrel, intravenous immunoglobulin and plasmapheresis. | Dead  |
| 25 | 2005[22] | F | 22 Yrs | 22 Yrs | —     | Skin (coexistent with protein S deficiency) | — | A moderate lymphohistiocytic inflammatory infiltrate was present at the lateral and deeper margins of this acellular area.                                                                       | Benign    | No treatment (just stopped contraceptive pills)                                | Alive |
| 26 | 2005[23] | M | 33 Yrs | 27 Yrs | —     | Skin                                        | — | An occluded arteriole at the base of the wedge-shaped area of sclerosis, the vessel has a discontinuous endothelial lining and is surrounded by lymphocytes and nuclear dust.                    | Benign    | No treatment                                                                   | Alive |
| 27 | 2005[24] | F | 24 Yrs | 16 Yrs | —     | Skin                                        | — | Striking mucin deposition was noted in the papillary and reticular dermis forming an inverted wedge-like pattern with the apex pointing to the deeper portion of the biopsy                      | Benign    | Aspirin ( and stopped contraceptive pills)                                     | Alive |
| 28 | 2006[25] | M | 31 Yrs | 31 Yrs | 6 Mos | Skin, GIT                                   | — | ND                                                                                                                                                                                               | Malignant | Prednisolone, aspirin, pentoxifyllin, warfarin                                 | Dead  |
| 29 | 2006[26] | F | 58 Yrs | NA     | NA    | Skin, eyes (optic nerves),                  | — | The biopsy showed thrombosis in the small dermal vessels and intimal hyperplasia. Epidermal atrophy,                                                                                             | Malignant | Methylprednisolone, antiplatelet and anticoagulant therapy.                    | Dead  |

|    |          |   |        |        |        |                                    |   |                                                                                                                                                                                                                  |           |                                                            |                                       |
|----|----------|---|--------|--------|--------|------------------------------------|---|------------------------------------------------------------------------------------------------------------------------------------------------------------------------------------------------------------------|-----------|------------------------------------------------------------|---------------------------------------|
|    |          |   |        |        |        | CNS(brain and spinal cord), GIT    |   | myxomatous degeneration, and focal necrosis in the dermis.                                                                                                                                                       |           |                                                            |                                       |
| 30 | 2007[27] | F | 47 Yrs | 46 Yrs | —      | Skin                               | — | Epidermal atrophy with overlying orthokeratosis and hyalinization of collagen beneath.                                                                                                                           | Benign    | ND                                                         | ND                                    |
| 31 | 2007[28] | F | 16 Yrs | 10 Yrs | —      | Skin                               | — | Hematoxylin-eosin stained sections reveal mild epidermal acanthosis and a lymphocytic infiltrate in the papillary dermis.                                                                                        | Benign    | Aspirin                                                    | Alive                                 |
| 32 | 2007[29] | F | 38 Yrs | 37 Yrs | 1 Yr   | Skin, GIT                          | — | Epidermal atrophy and a large acellular area in the dermis in a well-developed lesion.<br>An altered vessel below the dermal necrobiotic zone with the lumen occluded by a thrombus in a newly developed lesion. | Malignant | Warfarin, dipyridamole and lipoprostaglandin E1, IVIG      | Stable through 11 months of follow-up |
| 33 | 2008[30] | F | 40 Yrs | 38 Yrs | 16 Mos | Skin, GIT                          | — | ND                                                                                                                                                                                                               | Malignant | ND                                                         | Dead                                  |
| 34 | 2008[31] | M | 60 Yrs | 56 Yrs | 4 Yrs  | Skin, GIT, CNS, eyes(optic nerves) | — | The presence of swollen endothelial cells and lymphocyte-mediated vasculitis with fibrinoid necrosis, in absence of mucine deposits.                                                                             | Malignant | Acenocoumarol, methylprednisolone, IVIG, anti-TNF $\alpha$ | Dead                                  |
| 35 | 2008[32] | F | 2 Yrs  | 16 Mos | 8 Mos  | Skin, GIT                          | — | Epidermal atrophy, hyperkeratosis, necrobiotic dermal collagen, vessel                                                                                                                                           | Malignant | Aspirin, dipyridamole                                      | Alive                                 |

|    |          |   |        |        |       |                              |   |                                                                                                                                                                                                                                                                                                                                                    |           |                                                                  |                                       |
|----|----------|---|--------|--------|-------|------------------------------|---|----------------------------------------------------------------------------------------------------------------------------------------------------------------------------------------------------------------------------------------------------------------------------------------------------------------------------------------------------|-----------|------------------------------------------------------------------|---------------------------------------|
|    |          |   |        |        |       |                              |   | thrombosis, inflammatory infiltrate, mucin deposition                                                                                                                                                                                                                                                                                              |           |                                                                  |                                       |
| 36 | 2008[33] | M | 59 Yrs | 57 Yrs | 2 Yrs | Skin, GIT                    | — | ND                                                                                                                                                                                                                                                                                                                                                 | Malignant | ND                                                               | Dead                                  |
| 37 | 2008[34] | M | 48 Yrs | 45 Yrs | 3 Yrs | Skin, GIT, CNS, heart, lungs | — | NA                                                                                                                                                                                                                                                                                                                                                 | Malignant | NA                                                               | Dead                                  |
| 38 | 2008[35] | F | 75 Yrs | 72 Yrs | 3 Yrs | Skin, GIT                    | — | Central epidermal necrosis overlying a zone of amorphous eosinophilia in dermis surrounded by lymphocytes. Amorphous dermis eosinophilia consistent with infarction. Central small blood vessel with thickened wall with focal fibrinoid changes surrounded by lymphocytes. Increased connective tissue mucin in dermis at the edge of an infarct. | Malignant | Prednisolone (balloon dilatation for splanchnic vessel stenosis) | Stable through 12 months of follow-up |
| 39 | 2009[36] | F | 43 Yrs | NA     | NA    | Skin, GIT                    | — | There were fibrin-platelet thrombi in some of the dermal vessels associated with a mild perivascular lymphocytic infiltrate. Immunofluorescence studies revealed no deposition of IgG, IgM, IgA, C3, C1q or fibrinogen.                                                                                                                            | Malignant | Aspirin                                                          | Dead                                  |
| 40 | 2009[37] | M | 6 Mos  | 6 Mos  | 3 Wks | Skin, CNS                    | — | Epidermal atrophy, wedge-shaped dermal necrosis, mucin deposition.                                                                                                                                                                                                                                                                                 | Malignant | Prednisolone                                                     | Dead                                  |
| 41 | 2009[38] | M | 47     | 40 Yrs | 7 Yrs | Skin, GIT                    | — | Atrophic and ulcerated epidermis and an                                                                                                                                                                                                                                                                                                            | Malignant | Antiplatelet,                                                    | Dead                                  |



|    |          |   |        |        |       |                |     |                                                                                                                                                                                                                                                          |           |                                           |                                       |
|----|----------|---|--------|--------|-------|----------------|-----|----------------------------------------------------------------------------------------------------------------------------------------------------------------------------------------------------------------------------------------------------------|-----------|-------------------------------------------|---------------------------------------|
|    |          |   | Yrs    |        |       |                |     | inverted wedge-shaped area of sclerosis in the underlying dermis and mucin deposition.                                                                                                                                                                   |           | anticoagulant, and pentoxifyline          |                                       |
| 42 | 2009[39] | F | 41 Yrs | 38 Yrs | 3 Yrs | Skin, GIT, CNS | —   | Absence of crests and atrophic epidermis. Intense perivascular inflammatory infiltrate.                                                                                                                                                                  | Malignant | Corticosteroids, aspirin, ticlopidine     | Stable through 18 months of follow-up |
| 43 | 2009[40] | M | 18 Yrs | 14 Yrs | 4 Yrs | Skin, GIT      | —   | Epidermal atrophy, wedge-shaped dermal necrosis, mucin deposition.                                                                                                                                                                                       | Malignant | Aspirin, Dipyridamole, methylprednisolone | Alive( but without follow-up)         |
| 44 | 2010[41] | F | 36 Yrs | 30 Yrs | —     | Skin           | Yes | Lobular panniculitis with lymphocytic and plasmocytic infiltrate, superficial hyalinosis, thrombus without inflammation, mucin deposition, and a wedge shaped zone of necrosis.                                                                          | Benign    | Prednisone, hydroxychloroquine            | Alive                                 |
| 45 | 2010[42] | F | 37 Yrs | 36 Yrs | 1 Yr  | Skin, GIT      | —   | A raised epidermis with focal ulceration overlying a dense infiltrate of lymphocytes and thrombosis in subcutaneous blood vessels                                                                                                                        | Malignant | Methylprednisolone, IVIG, anticoagulation | Dead                                  |
| 46 | 2011[43] | M | 15 Yrs | 13 Yrs | 2 Yrs | Skin, GIT      | —   | Hyperkeratosis, atrophic epidermis, basal layer hydropic degeneration in epidermis, on dermis collagen deposition and subendothelial sclerosis in arterial wall in segmental foci that caused ischemic infarct leading to atrophy of adnexal structures. | Malignant | Aspirin, Dipyridamol                      | Dead                                  |

|    |          |   |        |            |                             |                             |   |                                                                                                                                                                   |           |                                                            |                             |
|----|----------|---|--------|------------|-----------------------------|-----------------------------|---|-------------------------------------------------------------------------------------------------------------------------------------------------------------------|-----------|------------------------------------------------------------|-----------------------------|
| 47 | 2011[44] | F | 5 Yrs  | 3 Mos      | 15 Mos                      | Skin, CNS, eyes             | — | Central epidermal atrophy, papillary dermal sclerosis, and a sparse perivascular lymphocytic inflammatory infiltrate.                                             | Malignant | Aspirin                                                    | ND                          |
| 48 | 2011[45] | F | 30 Yrs | 30Yrs      | 6 Mos                       | Skin, GIT, pancreas, spleen | — | Wedge-shaped areas of altered dermis covered by atrophic epidermis with slight hyperkeratosis. Mucin deposition, moderate sclerosis, and collagen homogenization. | Malignant | Alemtuzumab, tacrolimus                                    | Dead                        |
| 49 | 2011[46] | M | 41 Yrs | 41 Yrs     | Simultaneous                | Skin, CNS, kidney           | — | Narrowing and occlusion of small caliber blood vessel lumen; secondary to intimal proliferation and thrombus. The vessel wall was PAS positive.                   | Malignant | Methylprednisolone, hemodialysis                           | Alive                       |
| 50 | 2011[47] | M | 32 Yrs | 32 Yrs     | —                           | Skin(coexisted with SLE)    | — | Dermal edema, mucin deposition and lymphocytic vasculitis.                                                                                                        | Benign    | Hydroxychloroquine and aspirin                             | Alive                       |
| 51 | 2011[48] | F | 15 Mos | Congenital | 9 mos                       | Skin, CNS, GIT              | — | Mid-dermal oedema, perivascular lymphocytic infiltration, endothelial swelling and fibrinoid necrosis of the affected vessels with loss of lumen caliber.         | Malignant | Aspirin, heparin                                           | Dead                        |
| 52 | 2012[49] | M | 42 Yrs | 42 Yrs     | Simultaneous                | Skin, GIT, CNS              | — | Ulceration with parakeratosis, abscesses, and altered collagen fibers. Perivascular lymphocytic infiltration in the upper dermis.                                 | Malignant | Methylpredisolone, cyclophosphamide, heparin, salpogralate | Alive                       |
| 53 | 2013[50] | M | 46 Yrs | 47 Yrs     | Cutaneous involvement after | Skin, GIT, heart, lungs     | — | A thrombotic microangiopathy along with dermal chronic microvascular changes characterized by thickened basement                                                  | Malignant | Ecuzumab, IVIG, low molecular weight heparin,              | Stable through 30 months of |

|    |          |   |           |                           |                            |                                |   |                                                                                                                                                                                                     |           |                                                                                              |                                     |
|----|----------|---|-----------|---------------------------|----------------------------|--------------------------------|---|-----------------------------------------------------------------------------------------------------------------------------------------------------------------------------------------------------|-----------|----------------------------------------------------------------------------------------------|-------------------------------------|
|    |          |   |           |                           | systemic<br>manifestations |                                |   | membrane zones along with superficial vascular ectasia and foci of vascular dropout.                                                                                                                |           |                                                                                              | follow-up                           |
| 54 | 2013[51] | F | 64<br>Yrs | 62 Yrs                    | 2 Yrs                      | Skin, GIT                      | — | Wedge-shaped degeneration of dermal collagen and thrombotic vessels at the bottom of the lesion.                                                                                                    | Malignant | Heparin, warfarin, dipyridamole                                                              | Dead                                |
| 55 | 2013[51] | F | 53<br>Yrs | 51 Yrs                    | —                          | Skin                           | — | Edematous papillary dermis with inflammatory cell infiltration at the center of the lesion, perivascular lymphocytic infiltrate encroaching upon the vascular walls at the periphery of the lesion. | Benign    | Prednisolone                                                                                 | Alive                               |
| 56 | 2013[52] | F | 42<br>Yrs | 39 Yrs                    | 3 Yrs                      | Skin, GIT, heart, bladder, CNS | — | Skin biopsy of upper arm lesion was initially read as “consistent with lupus”.                                                                                                                      | Malignant | Hydroxychloroquine, chloroquine, mycophenolate, cyclophosphamide, azathioprine, treprostinil | Stable through 3 years of follow-up |
| 57 | 2013[52] | M | 17<br>Yrs | 15 Yrs                    | 2 Yrs                      | Skin, GIT, bladder, CNS        | — | Wedge-shaped area of infarction, epidermal atrophy with collagen degradation.                                                                                                                       | Malignant | Ecuzumab, treprostinil                                                                       | Alive                               |
| 58 | 2013[53] | M | 50<br>Yrs | 48 Yrs                    | 2 Yrs                      | Skin, GIT, lungs               | — | ND                                                                                                                                                                                                  | Malignant | Aspirin, clopidogrel, and prednisolone                                                       | Dead                                |
| 59 | 2014[54] | F | 34<br>Yrs | 33 Yrs(8 months duration) | —                          | Skin                           | — | Extensive epidermal necrosis with foci of re-epithelialization and superficial and deep perivascular inflammatory infiltrate in the dermis.                                                         | Benign    | Aspirin                                                                                      | Alive                               |

|    |          |   |        |                            |                                                     |                |   |                                                                                                                                                                       |           |                                                                  |                                     |
|----|----------|---|--------|----------------------------|-----------------------------------------------------|----------------|---|-----------------------------------------------------------------------------------------------------------------------------------------------------------------------|-----------|------------------------------------------------------------------|-------------------------------------|
| 60 | 2014[54] | M | 44 Yrs | 44 Yrs(6 months duration)  | —                                                   | Skin           | — | An atrophic epidermis and dermal fibrosis with absence of pilosebaceous units.                                                                                        | Benign    | Anticoagulant                                                    | Alive                               |
| 61 | 2014[55] | M | 50 Yrs | NA                         | —                                                   | Skin           | — | An ulcerated epidermis overlying a wedge shaped area of necrosis in the dermis, with eosinophilic and densified collagen fibers and a decrease of dermal capillaries. | Benign    | ND                                                               | ND                                  |
| 62 | 2014[56] | M | 9 Yrs  | 6 Yrs                      | 3 Yrs                                               | Skin, CNS, GIT | — | Epidermal atrophy, hyperkeratosis, degeneration of basal cell layer, perivascular inflammatory infiltrate, mucin deposition.                                          | Malignant | Aspirin, methylprednisolone, Immunoglobulin                      | Stable through 2 years of follow-up |
| 63 | 2014[57] | M | 14 Yrs | 14 Yrs                     | Cutaneous involvement after systemic manifestations | CNS, skin      | — | Lymphocytic vasculitis characterized by perivascular lymphocytic infiltration, mucin deposition                                                                       | Malignant | Immunoglobulin, methylprednisolone, cyclophosphamide, enoxaparin | NA                                  |
| 64 | 2014[58] | F | 73 Yrs | 71 Yrs(18 months duration) | 2 Yrs                                               | Skin, GIT      | — | Wedge-shaped necrosis in the dermis and interstitial infiltration of lymphocytes as well as extravasation of erythrocytes.                                            | Malignant | Aspirin, Dipyridamol                                             | Dead                                |
| 65 | 2014[58] | F | 39 Yrs | 33 Yrs                     | —                                                   | Skin           | — | Non-inflammatory endarterial thrombotic occlusion, wedge necrosis, and infarction of the dermis, can further confirm the diagnosis.                                   | Benign    | Aspirin, Dipyridamol                                             | Alive                               |

|    |          |   |        |        |       |                                       |   |                                                                                                                                                                                                                                                                     |           |                                                                                |       |
|----|----------|---|--------|--------|-------|---------------------------------------|---|---------------------------------------------------------------------------------------------------------------------------------------------------------------------------------------------------------------------------------------------------------------------|-----------|--------------------------------------------------------------------------------|-------|
| 66 | 2014[59] | M | 38 Yrs | 37 Yrs | —     | Skin                                  | — | A wedge-shaped area of degenerated collagen with the apex extending into the dermis, which was oedematous and contained mucin deposits.                                                                                                                             | Benign    | PEG-IFN                                                                        | Alive |
| 67 | 2015[60] | F | 45 Yrs | 25 Yrs | —     | Skin(coexisted with Behcet's disease) | — | A wedge-shaped dermal infarct with a broad base toward the epidermis. An occluded dermal vessel is visible at the base of the dermal infarct area, and a lymphohistiocytic inflammatory infiltrate is visible at the lateral and deeper margins of the dermal area. | Benign    | Aspirin, dipyridamole(prednisolone, dapsone, and colchicine were ineffective ) | Alive |
| 68 | 2015[61] | M | 74 Yrs | NA     | —     | Skin                                  | — | Dermal necrosis without inflammatory infiltration, calcification and sclerosis in papillary dermis, hyalinosis of the blood vessel wall in deep layer of the dermis.                                                                                                | Benign    | Steroid and cyclophosphamide                                                   | Alive |
| 69 | 2015[62] | F | 47 Yrs | 41 Yrs | 7 Yrs | Skin, CNS, GIT                        | — | Central epidermal atrophy, papillary dermal sclerosis, and perivascular lymphocytic inflammatory cell infiltrates, in addition to vascular thrombosis.                                                                                                              | Malignant | Aspirin, dipyridamole                                                          | Dead  |
| 70 | 2015[63] | F | 49 Yrs | 41 Yrs | 8 Yrs | Skin, CNS, GIT                        | — | The overlying epidermis was atrophic and the wedge-shaped area of avascular necrosis was visible. Surrounded by interstitial mucin deposition in the dermis.                                                                                                        | Malignant | Plavix, dipyridamole, heparin, salpogralate, IVIG                              | Dead  |
| 71 | 2015[64] | M | 68 Yrs | 68 Yrs | 8 Mos | Skin, GIT                             | — | Wedge shaped necrosis was seen in the upper part of the dermis, with various degrees of ulceration and crust formation.                                                                                                                                             | Malignant | Steroid, aspirin, dipyridamole, IVIG                                           | Dead  |

|    |          |   |        |            |                                                     |                       |   |                                                                                                                                                                      |           |                                                                                                                    |                                      |
|----|----------|---|--------|------------|-----------------------------------------------------|-----------------------|---|----------------------------------------------------------------------------------------------------------------------------------------------------------------------|-----------|--------------------------------------------------------------------------------------------------------------------|--------------------------------------|
| 72 | 2016[65] | F | 47 Yrs | 47 Yrs     | 5 Mos                                               | Skin, GIT             | — | Widespread area of fibrosis in the dermis subjacent to an atrophic epidermis without mucin deposition.                                                               | Malignant | Corticosteroid, aspirin, pentoxifylline, hydroxychloroquine.                                                       | Dead                                 |
| 73 | 2016[66] | M | 4 Yrs  | 4 Yrs      | Cutaneous Involvement after systemic manifestations | CNS, skin, GIT        | — | Epidermal atrophy, hyperkeratosis, mucin deposition, fibrin thrombi.                                                                                                 | Malignant | Methylprednisolone, cyclophosphamide, immunoglobulin, rituximab, Infliximab, treprostinil, eculizumab, natalizumab | Dead                                 |
| 74 | 2016[67] | F | 27 Yrs | 26 Yrs     | 1 Yr                                                | skin, GIT             | — | Hyperparakeratosis and central atrophy of the epidermis as well as thrombosed venules with hyalinized walls                                                          | Malignant | Acetylsalicylic acid, IVIG                                                                                         | Dead                                 |
| 75 | 2016[68] | F | 55 Yrs | 50 Yrs     | 5 Yrs                                               | Skin, GIT, CNS, heart | — | Lichenoid dermatitis with hyperkeratosis, patchy lymphocytic infiltrate, hemosiderin deposition, increased dermal mucin, and colloid bodies in the papillary dermis. | Malignant | Eculizumab, aspirin, apixaban                                                                                      | Stable through 6 months of follow-up |
| 76 | 2016[69] | M | 56 Yrs | 55 Yrs     | 6 Mos                                               | Skin, GIT             | — | Epidermal atrophy, thrombosis of vessel in papillary dermis along with perivascular lymphocytic infiltrate, dermal sclerosis.                                        | Malignant | Low molecular weight heparin, pentoxifylline                                                                       | Dead                                 |
| 77 | 2017[70] | F | 4 Mos  | Congenital | —                                                   | skin                  | — | Epidermal atrophy, lymphocytic interface dermatitis                                                                                                                  | Benign    | Aspirin, dipyridamole                                                                                              | Alive                                |
| 78 | 2017[71] | F | 50 Yrs | 50 Yrs     | —                                                   | skin                  | — | Lymphohistiocytic perivascular infiltrates, lymphocytic vasculitis, thrombotic                                                                                       | Benign    | ND                                                                                                                 | Alive                                |

|           |                    |   |        |        |        |                |     |                                                                                                                                                                              |           |                                                      |      |
|-----------|--------------------|---|--------|--------|--------|----------------|-----|------------------------------------------------------------------------------------------------------------------------------------------------------------------------------|-----------|------------------------------------------------------|------|
|           |                    |   |        |        |        |                |     | occlusion, and abundant red blood cell extravasation                                                                                                                         |           |                                                      |      |
| <b>79</b> | 2017[72]           | M | 4 Yrs  | 3 Yrs  | 11 Mos | Skin, CNS      | —   | Interface dermatitis, perivascular lymphocytary inflammation, lymphocytary vasculitis and an ischemic area in the papillary dermis with no mucin deposition.                 | Malignant | Eculizumab, aspirin, IVIG                            | Dead |
| <b>80</b> | Current case, 2017 | F | 30 Yrs | 27 Yrs | 3 Yrs  | Skin, GIT, CNS | Yes | The epidermis of overlying revealed hyperkeratosis, focal atrophy, acanthosis disappeared. The junction of the epidermis and the dermis has localized vacuolar degeneration. | Malignant | Aspirin, Dalteparin, methylprednisolone, alprostadil | Dead |

CNS: central nervous system; F: female; GIT: gastrointestinal tract; M: male; NA: not available; ND: none declared.

- [1] Egan R, Lessell S. Posterior subcapsular cataract in Degos disease. *American journal of ophthalmology*. 2000;**129**; 806-807.
- [2] Guven FO, Bozdag KE, Ermete M, Karaman A. Degos' disease. *International journal of dermatology*. 2000;**39**; 361-362.
- [3] Thomson KF, Hight AS. Penile ulceration in fatal malignant atrophic papulosis (Degos' disease). *The British journal of dermatology*. 2000;**143**; 1320-1322.
- [4] Yukiiri K, Mizushige K, Ueda T, et al. Degos' disease with constrictive pericarditis: a case report. *Japanese circulation journal*. 2000;**64**; 464-467.
- [5] Beales IL. Malignant atrophic papulosis presenting as gastroparesis. *The American journal of gastroenterology*. 2001;**96**; 3462.
- [6] Chave TA, Varma S, Patel GK, Knight AG. Malignant atrophic papulosis (Degos' disease): clinicopathological correlations. *Journal of the European Academy of Dermatology and Venereology : JEADV*. 2001;**15**; 43-45.

- [7] Harvell JD, Williford PL, White WL. Benign cutaneous Degos' disease: a case report with emphasis on histopathology as papules chronologically evolve. *The American Journal of dermatopathology*. 2001;**23**; 116-123.
- [8] Vicktor C, Schultz-Ehrenburg U. [Malignant atrophic papulosis (Kohlmeier-Degos): diagnosis, therapy and course]. *Der Hautarzt; Zeitschrift fur Dermatologie, Venerologie, und verwandte Gebiete*. 2001;**52**; 734-737.
- [9] Bogenrieder T, Kuske M, Landthaler M, Stolz W. Benign Degos' disease developing during pregnancy and followed for 10 years. *Acta dermato-venereologica*. 2002;**82**; 284-287.
- [10] Torrelo A, Sevilla J, Mediero IG, Candelas D, Zambrano A. Malignant atrophic papulosis in an infant. *The British journal of dermatology*. 2002;**146**; 916-918.
- [11] Gonzalez Valverde FM, Menarguez Pina F, Ruiz JA, et al. Presentation of Degos syndrome as acute small-bowel perforation. *Archives of surgery (Chicago, Ill : 1960)*. 2003;**138**; 57-58.
- [12] Kanekura T, Uchino Y, Kanzaki T. A case of malignant atrophic papulosis successfully treated with nicotine patches. *The British journal of dermatology*. 2003;**149**; 660-662.
- [13] Ojeda Cuchillero RM, Sanchez Regana M, Umberto Millet P. Benign cutaneous Degos' disease. *Clinical and experimental dermatology*. 2003;**28**; 145-147.
- [14] Thomas RK, Nithyanandam S, Rawoof BA, Rajendran SC. Malignant atrophic papulosis. Report of a case with multiple ophthalmic findings. *Indian journal of ophthalmology*. 2003;**51**; 260-263.
- [15] Wachter T, Rose C, Brocker EB, Leverkus M. [Benign course of malignant atrophic papulosis (Kohlmeier-Degos disease): lack of vessel occlusion as



good prognostic sign?]. Journal der Deutschen Dermatologischen Gesellschaft = Journal of the German Society of Dermatology : JDDG. 2003;**1**; 374-377.

[16] Coskun B, Saral Y, Cicek D, Ozercan R. Benign cutaneous Degos' disease: a case report and review of the literature. The Journal of dermatology. 2004;**31**; 666-670.

[17] High WA, Aranda J, Patel SB, Cockerell CJ, Costner MI. Is Degos' disease a clinical and histological end point rather than a specific disease? Journal of the American Academy of Dermatology. 2004;**50**; 895-899.

[18] Kocheril SV, Blaivas M, Appleton BE, McCune WJ, Ike RW. Degos' disease mimicking vasculitis. Arthritis and rheumatism. 2004;**51**; 498-500.

[19] Amato C, Ferri R, Elia M, et al. Nervous system involvement in Degos disease. AJNR American journal of neuroradiology. 2005;**26**; 646-649.

[20] Aydogan K, Alkan G, Karadogan Koran S, Adim SB, Kiyici M, Tokgoz N. Painful penile ulceration in a patient with malignant atrophic papulosis. Journal of the European Academy of Dermatology and Venereology : JEADV. 2005;**19**; 612-616.

[21] Fernandez-Perez ER, Grabscheid E, Scheinfeld NS. A case of systemic malignant atrophic papulosis (Kohlmeier-Degos' disease). Journal of the National Medical Association. 2005;**97**; 421-425.

[22] Gilaberte Y, Coscojuela C, Lezaun A, Marigil MA. Degos disease associated with protein S deficiency. The British journal of dermatology. 2005;**153**; 666-667.

[23] Loewe R, Palatin M, Petzelbauer P. Degos disease with an inconspicuous clinical course. Journal of the European Academy of Dermatology and Venereology : JEADV. 2005;**19**; 477-480.

[24] Zamiri M, Jarrett P, Snow J. Benign cutaneous Degos disease. International journal of dermatology. 2005;**44**; 654-656.

[25] Hohwy T, Jensen MG, Tottrup A, Steiniche T, Fogh K. A fatal case of malignant atrophic papulosis (Degos' disease) in a man with factor V Leiden

mutation and lupus anticoagulant. *Acta dermato-venereologica*. 2006;**86**; 245-247.

[26] Matsuura F, Makino K, Fukushima T, et al. Optic nerve and spinal cord manifestations of malignant atrophic papulosis (Degos disease). *Journal of neurology, neurosurgery, and psychiatry*. 2006;**77**; 260-262.

[27] Tan WP, Chio MT, Ng SK. Generalized red papules with gastrointestinal complications. Diagnosis: malignant atrophic papulosis (Degos' disease). *Clinical and experimental dermatology*. 2007;**32**; 615-616.

[28] Wilson J, Walling HW, Stone MS. Benign cutaneous Degos disease in a 16-year-old girl. *Pediatric dermatology*. 2007;**24**; 18-24.

[29] Zhu KJ, Zhou Q, Lin AH, Lu ZM, Cheng H. The use of intravenous immunoglobulin in cutaneous and recurrent perforating intestinal Degos disease (malignant atrophic papulosis). *The British journal of dermatology*. 2007;**157**; 206-207.

[30] Amaravadi RR, Tran TM, Altman R, Scheirey CD. Small bowel infarcts in Degos disease. *Abdominal imaging*. 2008;**33**; 196-199.

[31] De Breucker S, Vandergheynst F, Decaux G. Inefficacy of intravenous immunoglobulins and infliximab in Degos' disease. *Acta clinica Belgica*. 2008;**63**; 99-102.

[32] Jalil J, Shafique M, Rashid Dar N. Dermatological clue to diagnosis of Degos disease in a 2-year-old with obscure chronic abdominal pain. *Clinical pediatrics*. 2008;**47**; 180-182.

[33] Kim DW, Kang SB, Lee KH, Choe GY, Park SY, Nicholay M. Degos' disease (malignant atrophic papulosis) as a fatal cause of acute abdomen: report of a case. *Surgery today*. 2008;**38**; 866-870.

[34] Notash AY, Mazoochy H, Mirshams M, Nikoo A. Lethal systemic Degos disease with prominent cardio-pulmonary involvement. *Saudi medical journal*. 2008;**29**; 133-137.

- [35] Subramaniam K, Debinski H, Heenan P. Degos' disease with delayed involvement of the gastrointestinal tract. *The Australasian journal of dermatology*. 2008;**49**; 86-90.
- [36] Chung HY, Trendell-Smith NJ, Yeung CK, Mok MY. Degos' disease: a rare condition simulating rheumatic diseases. *Clinical rheumatology*. 2009;**28**; 861-863.
- [37] Moss C, Wassmer E, Debelle G, et al. Degos disease: a new simulator of non-accidental injury. *Developmental medicine and child neurology*. 2009;**51**; 647-650.
- [38] Nikoo A, Safaei Naraghi Z, Mirshams M. Malignant Atrophic Papulosis (MAP, Degos' disease). *Archives of Iranian medicine*. 2009;**12**; 195-197.
- [39] Slaviero F, Annes RD, Frighetto L, et al. Kohlmeier-Degos Disease (malignant atrophic papulosis) and neurologic involvement. *Arquivos de neuro-psiquiatria*. 2009;**67**; 692-694.
- [40] Wang XW, Liu X, Zeng Z, Li YX. [Degos' disease: A case report and review of literature]. *Beijing da xue xue bao Yi xue ban = Journal of Peking University Health sciences*. 2009;**41**; 487-488.
- [41] Ortiz A, Ceccato F, Albertengo A, Roverano S, Iribas J, Paira S. Degos cutaneous disease with features of connective tissue disease. *Journal of clinical rheumatology : practical reports on rheumatic & musculoskeletal diseases*. 2010;**16**; 132-134.
- [42] Zheng XY, Huang DY, Xin Y, Wang XF. Malignant atrophic papulosis with severe gastrointestinal perforation and omental necrosis: a case report. *The Journal of international medical research*. 2010;**38**; 1164-1169.
- [43] Ahmadi M, Rafi SA, Faham Z, Azhough R, Rooy SB, Rahmani O. A fatal case of Degos' disease which presented with recurrent intestinal perforation. *World journal of gastrointestinal surgery*. 2011;**3**; 156-158.

- [44] Gutierrez-Pascual M, Hernandez-Martin A, Colmenero I, Garcia-Penas JJ, Lopez-Pino MA, Torrelo A. Malignant atrophic papulosis: a case report with severe visual and neurological impairment. *Pediatric dermatology*. 2011;**28**; 302-305.
- [45] Passarini B, Balestri R, D'Errico A, Pinna AD, Infusino SD. Lack of recurrence of malignant atrophic papulosis of Degos in multivisceral transplant: insights into possible pathogenesis? *Journal of the American Academy of Dermatology*. 2011;**65**; e49-50.
- [46] Pati S, Muley SA, Grill MF, Coons S, Walker R. Post-streptococcal vasculopathy with evolution to Degos' disease. *Journal of the neurological sciences*. 2011;**300**; 157-159.
- [47] Riyaz N, Saleem R, Shafeeq R. Degos disease-like presentation in systemic lupus erythematosus. *Indian journal of dermatology, venereology and leprology*. 2011;**77**; 219-221.
- [48] Yeo TH, Vassallo G, Judge M, Laycock N, Kelsey A, Crow YJ. Infantile neurological Degos disease. *European journal of paediatric neurology : EJPN : official journal of the European Paediatric Neurology Society*. 2011;**15**; 167-170.
- [49] Kameda T, Dobashi H, Yoneda K, et al. A case of Degos disease successfully treated with corticosteroid combined with cyclophosphamide. *Rheumatology international*. 2012;**32**; 2169-2173.
- [50] Magro CM, Wang X, Garrett-Bakelman F, Laurence J, Shapiro LS, DeSancho MT. The effects of Eculizumab on the pathology of malignant atrophic papulosis. *Orphanet journal of rare diseases*. 2013;**8**; 185.
- [51] Meehansan J, Komine M, Hosoda S, et al. Possible involvement of SDF-1/CXCL12 in the pathogenesis of Degos disease. *Journal of the American Academy of Dermatology*. 2013;**68**; 138-143.
- [52] Shapiro LS, Toledo-Garcia AE, Farrell JF. Effective treatment of malignant atrophic papulosis (Kohlmeier-Degos disease) with treprostinil--early

experience. Orphanet journal of rare diseases. 2013;**8**; 52.

[53] Yeung JT, Ma JK, Yung AW. Degos' syndrome complicated by bowel perforation: focus on radiological findings. Hong Kong medical journal = Xianggang yi xue za zhi. 2013;**19**; 174-177.

[54] Anker JP, Kaminska-Winciorek G, Lallas A, et al. The dermoscopic variability of Degos disease at different stages of progression. Dermatology practical & conceptual. 2014;**4**; 59-61.

[55] Cavalie M, Tsilika K, Sillard L, et al. Reflectance confocal microscopy features of Degos disease. JAMA dermatology. 2014;**150**; 96-97.

[56] Guo YF, Pan WH, Cheng RH, Yu H, Liao WQ, Yao ZR. Successful treatment of neurological malignant atrophic papulosis in child by corticosteroid combined with intravenous immunoglobulin. CNS neuroscience & therapeutics. 2014;**20**; 88-91.

[57] Karaoglu P, Topcu Y, Bayram E, et al. Severe neurologic involvement of Degos disease in a pediatric patient. Journal of child neurology. 2014;**29**; 550-554.

[58] Li Z, Jin P, Wang B, Feng S. Two cases of Degos disease with different prognosis. Postepy dermatologii i alergologii. 2014;**31**; 425-427.

[59] Zaharia D, Truchot F, Ronger-Savle S, Balme B, Thomas L. Benign form of atrophic papulosis developed at injection sites of pegylated-alpha-interferon: is there a pathophysiological link? The British journal of dermatology. 2014;**170**; 992-994.

[60] Kim YJ, Yun SJ, Lee SC, Lee JB. Degos Disease Associated with Behcet's Disease. Annals of dermatology. 2015;**27**; 235-236.

[61] Li Cavoli G, Li Cavoli TV, Rotolo U. Renal involvement in Malignant Atrophic Papulosis (Degos Disease). Anais brasileiros de dermatologia. 2015;**90**; 285.

[62] Liu F, Liu H, Zhang M, Yan W, Sang H. A case of malignant atrophic papulosis with cranial nerve and peripheral nerve impairment. Anais brasileiros

de dermatologia. 2015;**90**; 19-21.

[63] Su Z, Lu Y, Ge Y, et al. Central nervous system involvement in systemic malignant atrophic papulosis (Degos disease): a case report. *International journal of dermatology*. 2015;**54**; 699-703.

[64] Umemura M, Miwa Y, Yanai R, et al. A case of Degos disease: demonstration of C5b-9-mediated vascular injury. *Modern rheumatology*. 2015;**25**; 480-483.

[65] Fluhler C, Stinco G, di Meo N, et al. Malignant form of atrophic papulosis with lethal abdominal involvement. *Journal of the European Academy of Dermatology and Venereology : JEADV*. 2016;**30**; 126-128.

[66] Gmuca S, Boos MD, Treece A, et al. Degos disease mimicking primary vasculitis of the CNS. *Neurology(R) neuroimmunology & neuroinflammation*. 2016;**3**; e206.

[67] Hiernickel C, Goetze S, Schliemann S, Elsner P. A dramatic case of malignant atrophic papulosis (Kohlmeier-Degos disease) with fatal outcome. *Journal der Deutschen Dermatologischen Gesellschaft = Journal of the German Society of Dermatology : JDDG*. 2016;**14**; 839-840.

[68] Oliver B, Boehm M, Rosing DR, et al. Diffuse atrophic papules and plaques, intermittent abdominal pain, paresthesias, and cardiac abnormalities in a 55-year-old woman. *Journal of the American Academy of Dermatology*. 2016;**75**; 1274-1277.

[69] Viswanath V, Gada JL, Shah RJ. Degos Disease: A Murderous Menace. *Indian journal of dermatology*. 2016;**61**; 572-574.

[70] Calderon-Castrat X, Castro R, Peceros-Escalante J, Villate Caballero M, Chian C, Ballona R. Congenital Degos Disease: Case Report and Dermoscopic Findings. *Pediatric dermatology*. 2017.

[71] Kim E, Motaparathi K. Benign Atrophic Papulosis (Degos Disease) With Lymphocytic Vasculitis and Lichen Sclerosus-Like Features. *The American*

Journal of dermatopathology. 2017.

[72] Ximena CC, Manuela YC, Arantza H, Angel SB, Emilia FL. Degos disease, not just a scar: lethal outcome inspite of immunomodulatory therapy. Journal of the European Academy of Dermatology and Venereology : JEADV. 2017.
